# Supplementary material
Source: PubMed Central journal article supplement (PMC9333997)
Supplement: mmc1.pdf [file mmc1.pdf]

# THE LANCET

## Supplementary appendix

This appendix formed part of the original submission. We post it as supplied by the authors.

Supplement to: Mehta P, Titanji B K. Baricitinib in COVID-19: a coming-of-age from artificial intelligence to reducing mortality. *Lancet* 2022; **400**: 338–339.

|                                 |                  | <u>ACTT-2</u><br>Kalil et al, NEJM, 2021                                                                                                                                                                                                                                                                                                                                                                                                                                                           | <u>COV-BARRIER</u><br>Marconi et al, Lancet Resp Med, 2021                                                                                                                                                                                                                                                                                                                                                                                                                                                                                                                                                 | <u>ACTT-4</u><br>Wolfe et al, Lancet Resp Med, 2022                                                                                                                                                                                                                                                                                                                                                                                                                                                       | <u>RECOVERY</u><br>Horby et al, Lancet, 2022                                                                                                                                                                                                                                                                                                                                                                                                                                                                               |
|---------------------------------|------------------|----------------------------------------------------------------------------------------------------------------------------------------------------------------------------------------------------------------------------------------------------------------------------------------------------------------------------------------------------------------------------------------------------------------------------------------------------------------------------------------------------|------------------------------------------------------------------------------------------------------------------------------------------------------------------------------------------------------------------------------------------------------------------------------------------------------------------------------------------------------------------------------------------------------------------------------------------------------------------------------------------------------------------------------------------------------------------------------------------------------------|-----------------------------------------------------------------------------------------------------------------------------------------------------------------------------------------------------------------------------------------------------------------------------------------------------------------------------------------------------------------------------------------------------------------------------------------------------------------------------------------------------------|----------------------------------------------------------------------------------------------------------------------------------------------------------------------------------------------------------------------------------------------------------------------------------------------------------------------------------------------------------------------------------------------------------------------------------------------------------------------------------------------------------------------------|
| <b>Study Design</b>             |                  | <ul style="list-style-type: none"> <li>• Double-blind, placebo-controlled RCT</li> <li>• International: 67 sites, 8 countries, n=1033</li> <li>• Stratified by disease severity, trial site</li> <li>• Analysis: Intention-to-treat</li> <li>• Enrollment: 8<sup>th</sup> May 2020 – 19<sup>th</sup> July 2020</li> <li>• Primary Outcome: time to recovery</li> <li>• Key secondary outcome: clinical status D15</li> </ul>                                                                       | <ul style="list-style-type: none"> <li>• Double-blind, placebo-controlled RCT, Phase III</li> <li>• International: 101 sites, 11 countries, n=1525</li> <li>• Stratified by disease severity, age, region, steroid use</li> <li>• Analysis: Intention-to-treat</li> <li>• Enrollment: 11<sup>th</sup> June 2020–15<sup>th</sup> Jan 2021</li> <li>• Primary Outcome: composite of progression in NIAID-OS or death</li> <li>• Key secondary outcome: mortality</li> </ul>                                                                                                                                  | <ul style="list-style-type: none"> <li>• Double-blind, double-placebo-controlled RCT</li> <li>• International, 67 sites, 5 countries, n=1010</li> <li>• Stratified by disease severity, trial site</li> <li>• Analysis: Intention-to-treat</li> <li>• Enrollment: 1<sup>st</sup> Dec 2020 – 13<sup>th</sup> April 2021</li> <li>• Primary Outcome: difference in mechanical ventilation-free survival by day 29</li> <li>• Key secondary outcome: Clinical status at D15 based on the NIAID-OS</li> </ul> | <ul style="list-style-type: none"> <li>• Open-label, adaptive RCT</li> <li>• UK, 159 sites, n = 8156</li> <li>• Analysis: Intention-to-treat</li> <li>• Enrolment: 2<sup>nd</sup> Feb 2021–29<sup>th</sup> Dec 2021</li> <li>• Primary outcome: 28-day mortality</li> <li>• Key secondary outcome: composite progression to IMV or death (for those not on IMV at baseline)</li> </ul>                                                                                                                                     |
| <b>P</b><br><u>Population</u>   |                  | <p><u>Key inclusion criteria:</u></p> <ul style="list-style-type: none"> <li>• Hospitalized, confirmed COVID-19, Age ≥18 years</li> <li>• Evidence of COVID-pneumonia, one of: <ul style="list-style-type: none"> <li>○ Radiographic infiltrates</li> <li>○ SpO2 ≤94% on room air</li> <li>○ Requiring supplemental oxygen, IMV, ECMO (i.e. NIAID 5-7)</li> </ul> </li> </ul> <p><u>Key Exclusion criteria:</u></p> <ul style="list-style-type: none"> <li>• Pregnancy / Breast-feeding</li> </ul> | <p><u>Key inclusion criteria:</u></p> <ul style="list-style-type: none"> <li>• Hospitalized, confirmed COVID-19, Age ≥18 years</li> <li>• NIAID-OS 4 (hospitalized, but no supplemental oxygen), 5 or 6. After Oct 2020 (results of ACTT-2), limited to requiring at supplemental oxygen or NIV, i.e. NIAID-OS 5 or 6</li> <li>• At least one elevated inflammatory marker above ULN: CRP, D-dimer, LDH or ferritin</li> </ul> <p><u>Key Exclusion criteria:</u></p> <ul style="list-style-type: none"> <li>• Mechanical ventilation or ECMO (NIAID-OS 7)</li> <li>• Pregnancy / Breast-feeding</li> </ul> | <p><u>Key inclusion criteria:</u></p> <ul style="list-style-type: none"> <li>• Hospitalized, confirmed COVID-19, Age ≥18 years</li> <li>• Supplemental oxygen i.e. NIAID-OS 5 or 6</li> </ul> <p><u>Key Exclusion criteria:</u></p> <ul style="list-style-type: none"> <li>• Mechanical ventilation or ECMO (NIAID-OS 7)</li> <li>• Pregnancy / Breast-feeding</li> </ul>                                                                                                                                 | <p><u>Key inclusion criteria:</u></p> <ul style="list-style-type: none"> <li>• Hospitalized, suspected or confirmed COVID-19, Age ≥2 years</li> </ul> <p><u>Key exclusion criteria:</u></p> <ul style="list-style-type: none"> <li>• Pregnancy / Breast-feeding</li> </ul>                                                                                                                                                                                                                                                 |
| <b>I</b><br><u>Intervention</u> |                  | <b>Baricitinib + Remdesivir + SOC (n=515)</b><br>Baricitinib dose: 4mg once daily (≤14 days)<br>Any corticosteroids 11%; Dexamethasone 6%                                                                                                                                                                                                                                                                                                                                                          | <b>Baricitinib + SOC (n=764)</b><br>Baricitinib dose: 4mg once daily (≤14 days)<br>Dexamethasone 92% (566/612)                                                                                                                                                                                                                                                                                                                                                                                                                                                                                             | <b>Baricitinib + Remdesivir + Placebo (n=516)</b><br>Baricitinib dose: 4mg once daily (≤14 days)                                                                                                                                                                                                                                                                                                                                                                                                          | <b>Baricitinib + SOC n=4148</b><br>Baricitinib dose: 4mg once daily for 10 days<br>Corticosteroids 96% (3962/4148)<br>Tocilizumab 23% (951/4148)                                                                                                                                                                                                                                                                                                                                                                           |
| <b>C</b><br><u>Comparator</u>   |                  | <b>Placebo + Remdesivir + SOC (n=518)</b><br>Any corticosteroids 13%; Dexamethasone 7%                                                                                                                                                                                                                                                                                                                                                                                                             | <b>Placebo + SOC (n=761)</b><br>Dexamethasone 90% (533/592)                                                                                                                                                                                                                                                                                                                                                                                                                                                                                                                                                | <b>Dexamethasone + Remdesivir + Placebo (n=494)</b>                                                                                                                                                                                                                                                                                                                                                                                                                                                       | <b>SOC alone n=4008</b><br>Corticosteroids 95% (3809/4008)<br>Tocilizumab 23% (921/4008)                                                                                                                                                                                                                                                                                                                                                                                                                                   |
| <b>O</b><br><u>Outcome</u>      | <b>Primary</b>   | <b>MET</b> the primary end-point.<br><br>Time to recovery significantly shorter in Baricitinib vs control group (median, 7 days vs. 8 days; rate ratio for recovery, 1.16; 95% CI, 1.01 to 1.32; P=0.03).                                                                                                                                                                                                                                                                                          | Did <b>NOT</b> meet the primary end-point.<br><br>No significant difference in composite of progression in NIAID-OS (score 6, 7 or 8) or death by D28 in baricitinib group vs control.                                                                                                                                                                                                                                                                                                                                                                                                                     | <b>Terminated early for futility</b> , as low probability of superiority. Did not show a difference between arms.<br><br>Mechanical ventilation-free survival by day 29 was similar between the study groups (Kaplan-Meier estimates of 87.0% [95% CI 83.7 to 89.6] in the Baricitinib + Remdesivir + placebo group and 87.6% [84.2 to 90.3] in the Dexamethasone + Remdesivir + placebo group; risk difference 0.6 [95% CI -3.6 to 4.8]; p=0.91).                                                        | <b>MET</b> the primary end-point.<br><br>28-day mortality lower in Baricitinib group 12% vs usual care 14%, age-adjusted rate ratio 0.87; 95% CI 0.77-0.98; p=0.026)<br>13% proportional reduction in mortality                                                                                                                                                                                                                                                                                                            |
|                                 | <b>Secondary</b> | Combination group had 30% higher odds of improvement in clinical status at D15 than the control group (OR 1.3; 95% CI, 1.0 to 1.6)                                                                                                                                                                                                                                                                                                                                                                 | A significant reduction in all-cause mortality between baricitinib vs control at <ul style="list-style-type: none"> <li>• D28, 8% vs 13% [HR 0.57, 95% CI 0.41-0.78, p=0.0018], NNT 20</li> <li>• D60, 10% vs 15% [HR 0.62, 95% CI 0.47-0.83, p=0.005]</li> </ul>                                                                                                                                                                                                                                                                                                                                          | Similar outcomes for clinical status at D15                                                                                                                                                                                                                                                                                                                                                                                                                                                               | Among patients not on IMV at baseline, allocation to Baricitinib was associated with a lower risk of progressing to the composite secondary outcome of invasive mechanical ventilation or death (16% vs. 17%, age-adjusted risk ratio 0.89, 95% CI 0.81 to 0.98)                                                                                                                                                                                                                                                           |
| <b>Comments</b>                 |                  | Very few patients on corticosteroids.<br>Not powered to detect a difference in mortality between the groups.<br><br>Greatest benefit of combination treatment in more severe disease i.e. patients with baseline NIAID-OS 6 (HFO or NIV) – time to recovery 10 days (combination) vs 18 days (control) (rate ratio for recovery 1.51: 95% CI 1.10-2.08)                                                                                                                                            | Subgroup analysis suggests greatest benefit in more severe disease, i.e. NIAID-OS 6, reduction in 28-day mortality significantly lower with Baricitinib vs. control (17% vs 29%, p=0.0065)<br><br>Safety: Similar TEAE Baricitinib (45%) vs. control (44%), serious infections, thromboembolic events and MACE similar between groups                                                                                                                                                                                                                                                                      | Dexamethasone associated with significantly more <ul style="list-style-type: none"> <li>• Adverse events (risk difference 7.5% [1.6 to 13.3]; p=0.014)</li> <li>• TEAE (risk difference 6.0% [2.8 to 9.3])</li> <li>• Severe or life-threatening AE (risk difference 7.7% [1.8 to 13.4]; p=0.012)</li> </ul>                                                                                                                                                                                              | Very large sample size.<br><br>No significant differences in the rates of non-coronavirus infection, thrombotic events, or clinically significant bleeding, but allocation to Baricitinib was associated with a significant reduction in new onset cardiac arrhythmia (2.3% vs 3.1%, p=0.017).<br><br>959 received both Baricitinib and Tocilizumab, 95% of whom were on Dexamethasone at baseline. The was no significant heterogeneity in primary outcome estimates when stratified by co-administration of Tocilizumab. |

RCT Randomised Controlled Trial, NIAID-OS (National Institute of Allergy and Infectious Disease Ordinal Scale); ULN; upper limit of normal; HR Hazard Ratio, NNT Number needed to treat; TEAE treatment emergent adverse event; MACE major adverse cardiovascular event; IMV invasive mechanical ventilation, ECMO extracorporeal membrane oxygenation; HFO high flow oxygen; NIV non-invasive ventilation

### **References:**

1. Kalil AC, Patterson TF, Mehta AK, et al. Baricitinib plus Remdesivir for Hospitalized Adults with Covid-19. *New England Journal of Medicine* 2020; 384(9): 795-807.
2. Marconi VC, Ramanan AV, de Bono S, et al. Efficacy and safety of baricitinib for the treatment of hospitalised adults with COVID-19 (COV-BARRIER): a randomised, double-blind, parallel-group, placebo-controlled phase 3 trial. *Lancet Respir Med* 2021; 9(12): 1407-18.
3. Wolfe CR, Tomashek KM, Patterson TF, et al. Baricitinib versus dexamethasone for adults hospitalised with COVID19 (ACTT-4): a randomised, double-blind, double placebo-controlled trial. *The Lancet Respiratory Medicine* 2022.
4. RECOVERY Collaborative Group. Baricitinib in patients admitted to hospital with COVID-19 (RECOVERY): a randomised, controlled, open-label, platform trial and updated meta-analysis. *Lancet* 2022.
